# Supplementary material for: [Retracted] Computer‐Aided Prediction and Identification of Phytochemicals as Potential Drug Candidates against MERS‐CoV
Source: Hindawi journal article supplement (doi:10.1155/2021/5578689), 2021-01-01
Supplement: f1 [file 5578689.f1.pdf]

# Computer aided prediction and identification of phytochemicals as potential drug candidates against MERS-CoV

## Supplementary material

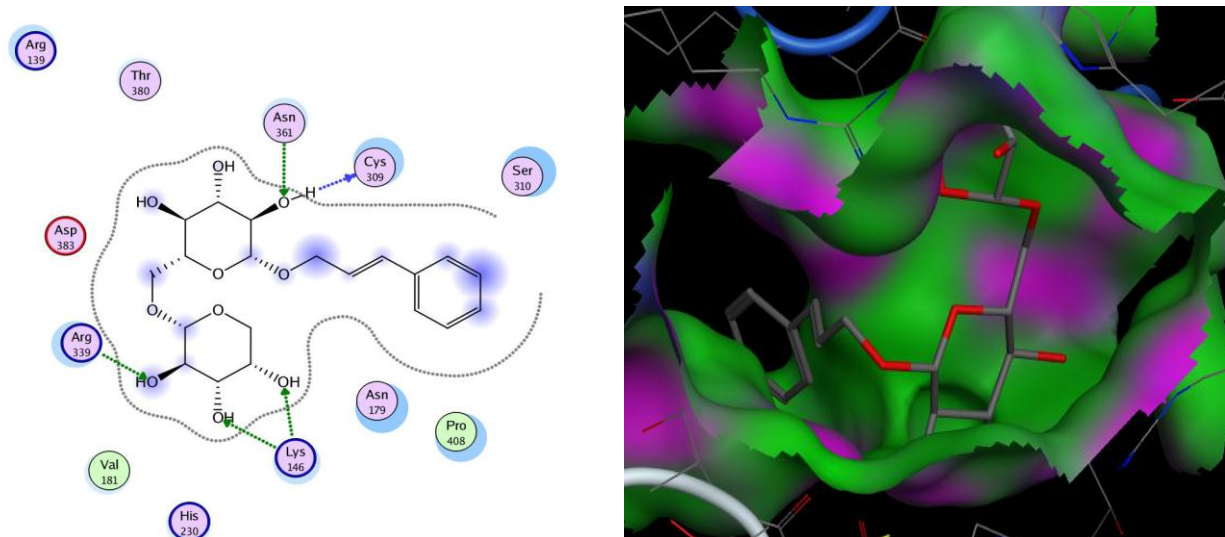

**Fig S1: Interactions (a) and binding patterns (b) of rosavin with MERS CoV nps13**

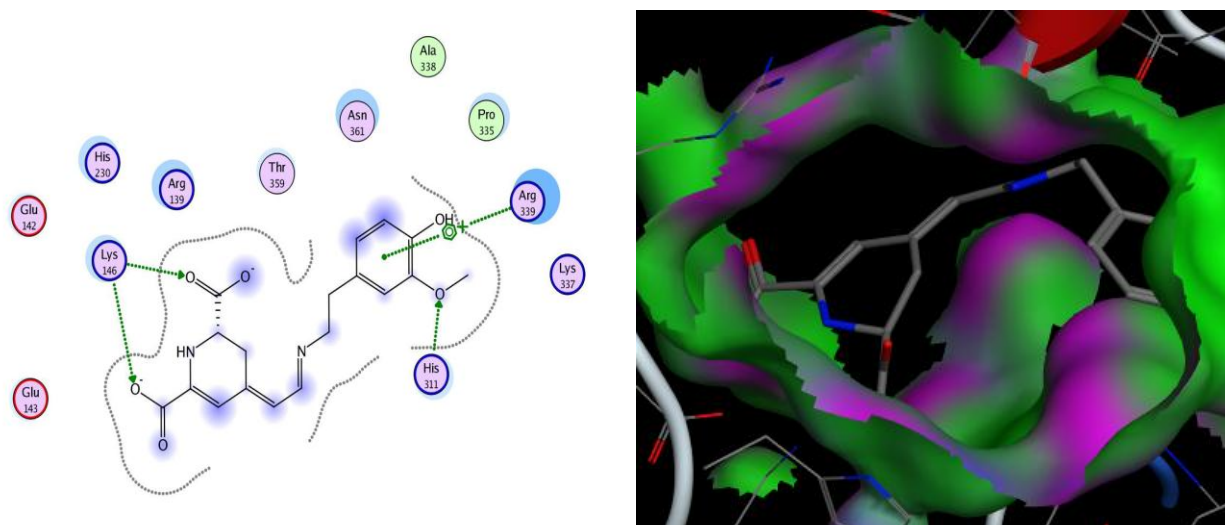

**Fig S2: Interactions (a) and binding patterns (b) of betaxanthin with MERS CoV nps13**

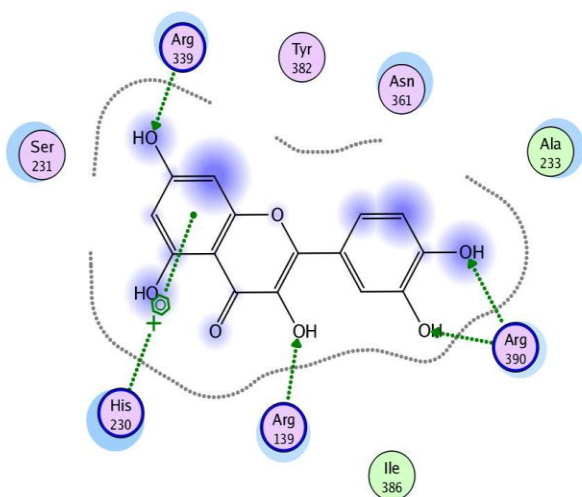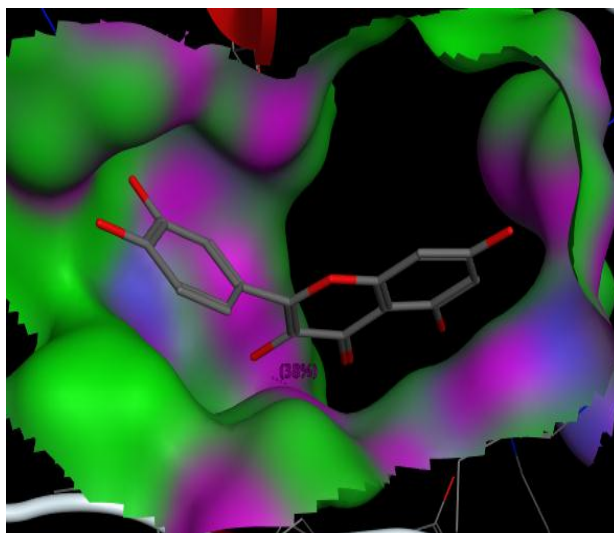

**Fig S3: Interactions (a) and binding patterns (b) of quercetin with MERS CoV nps13**

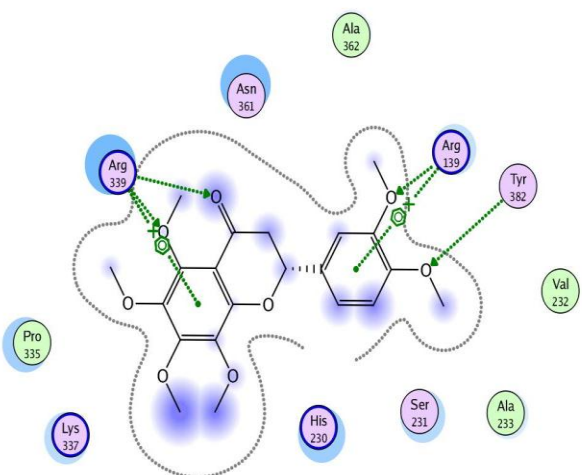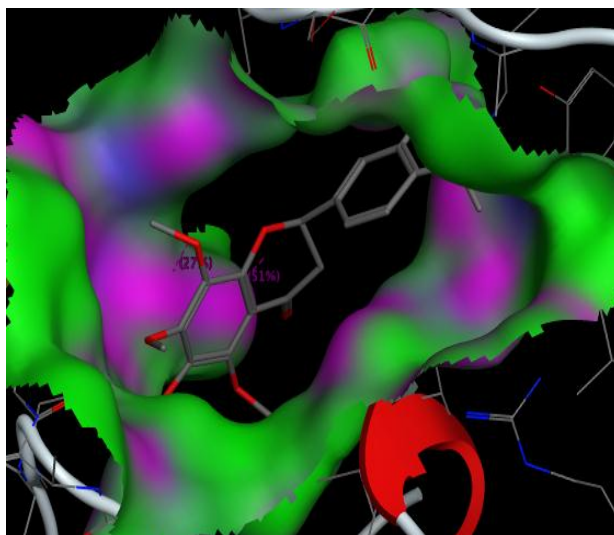

**Fig S4: Interactions (a) and binding patterns (b) of citromitin with MERS CoV nps13**

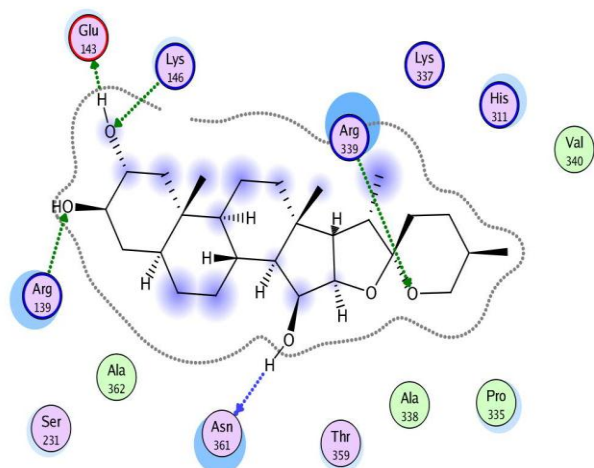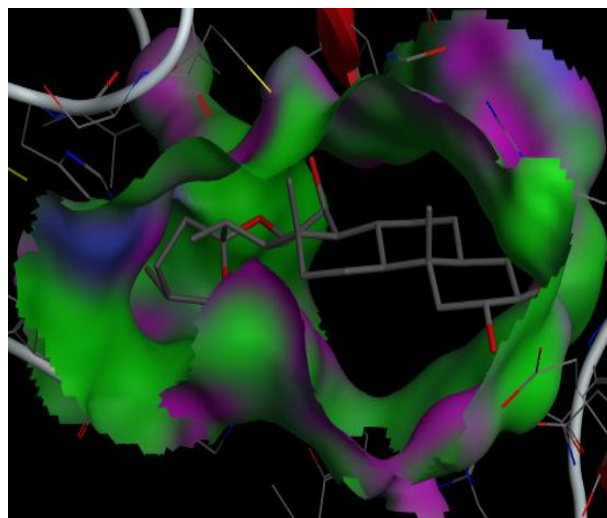

**Fig S5: Interactions (a) and binding patterns (b) of ichangin with MERS CoV nps13**

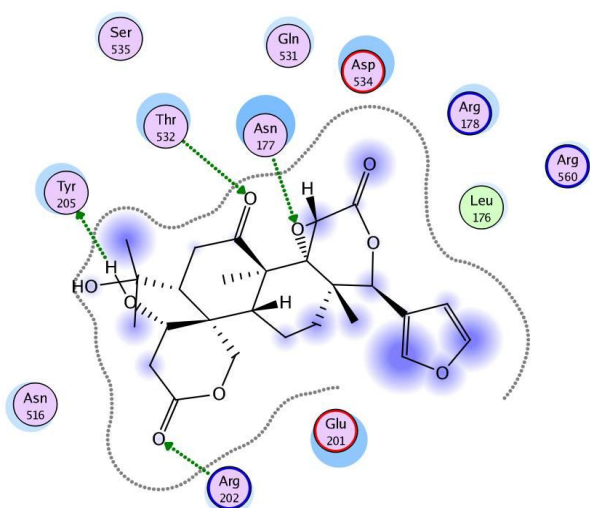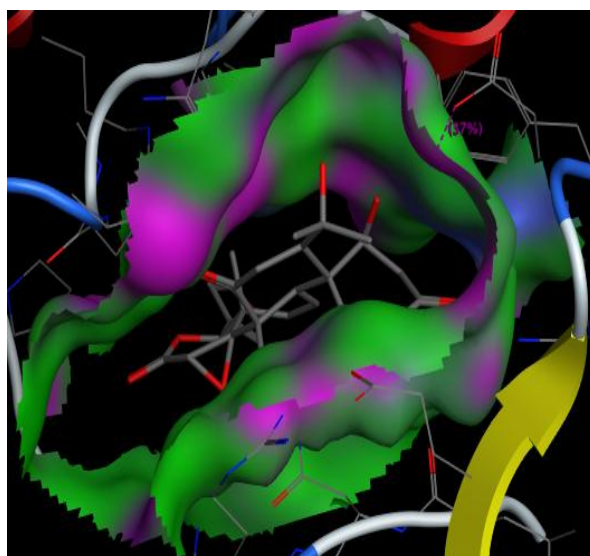

**Fig S6: Interactions (a) and binding patterns (b) of digitogenin with MERS CoV nps13**



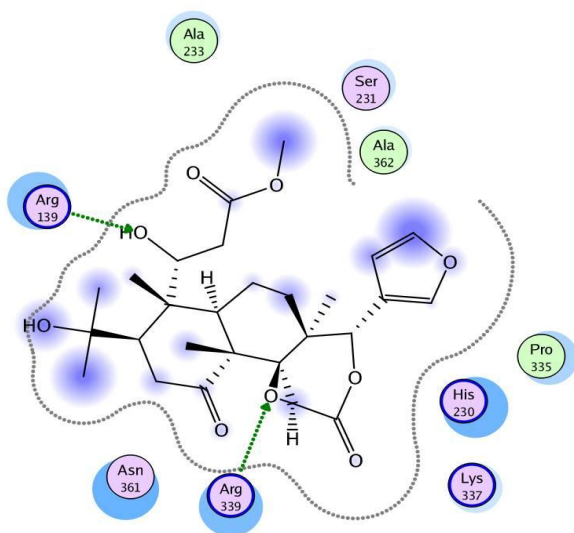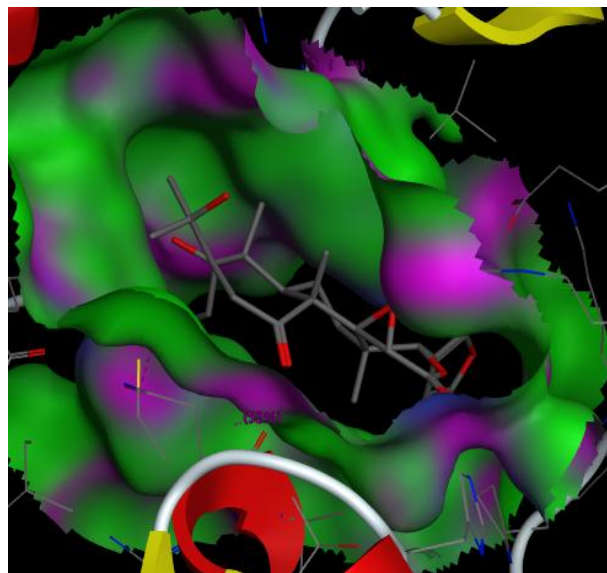

**Fig S7: Interactions (a) and binding patterns (b) of methyl deacetylnomilinate with MERS CoV nps13**

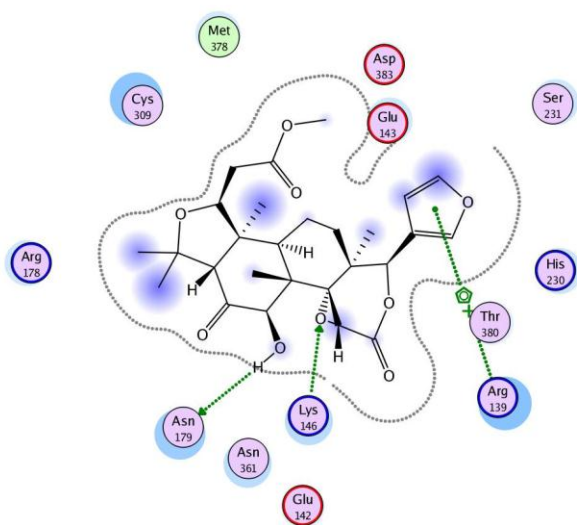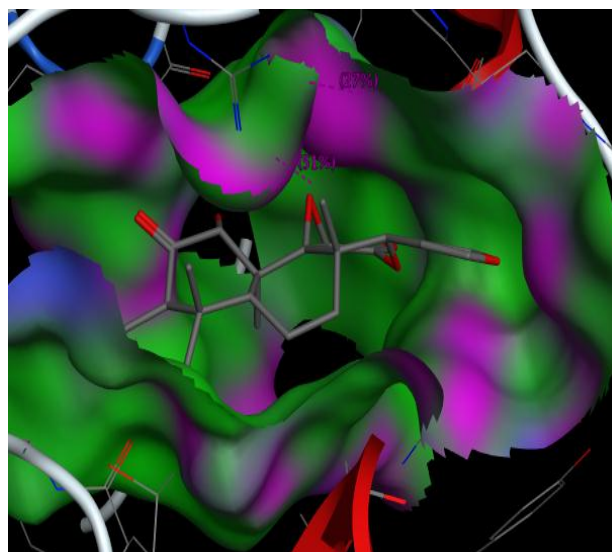

**Fig S8: Interactions (a) and binding patterns (b) of cyclocalamin with MERS CoV nps13**
